# Supplementary material for: Changes in Essential Oil Composition, Polyphenolic Compounds and Antioxidant Capacity of Ajowan (Trachyspermum ammi L.) Populations in Response to Water Deficit
Source: MDPI journal article supplement (doi:10.3390/foods11193084), 2022-10-05
Supplement: s1 [file s1]

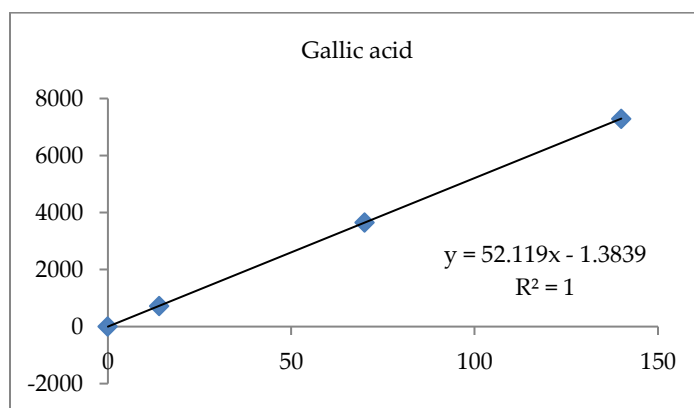

(a)

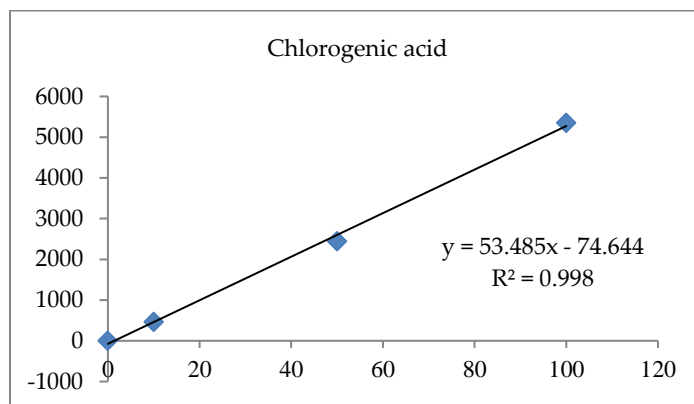

(b)

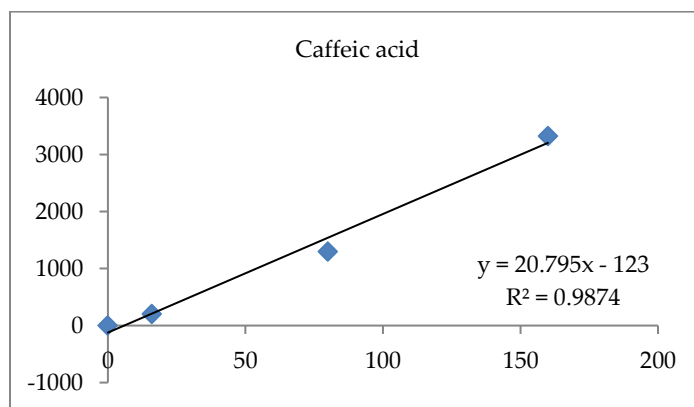

(c)

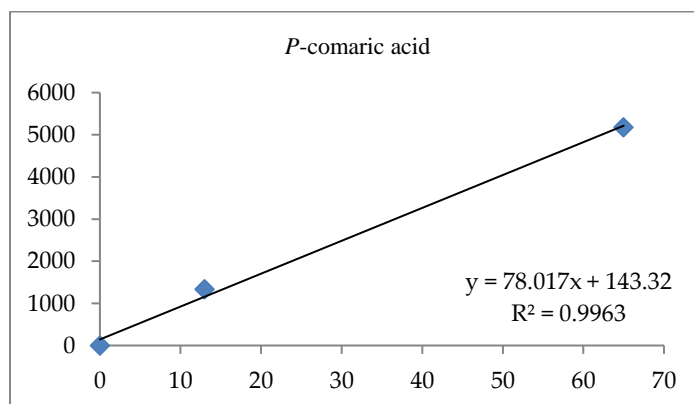

(d)

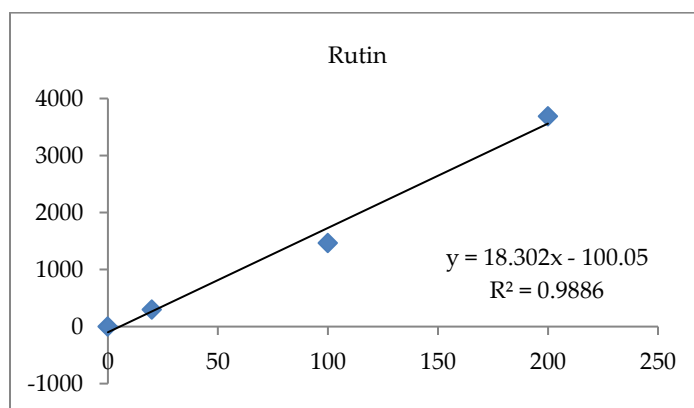

(e)

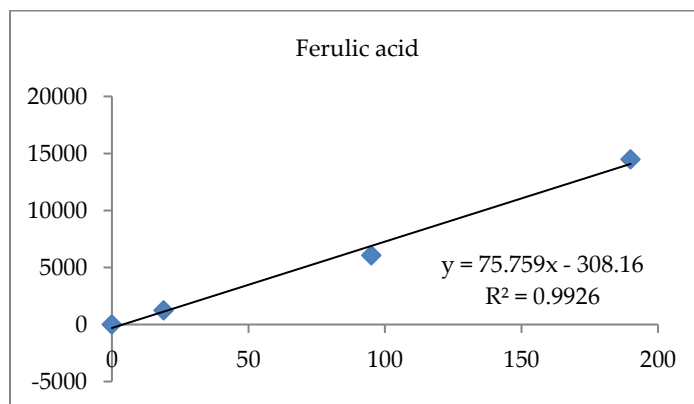

(f)

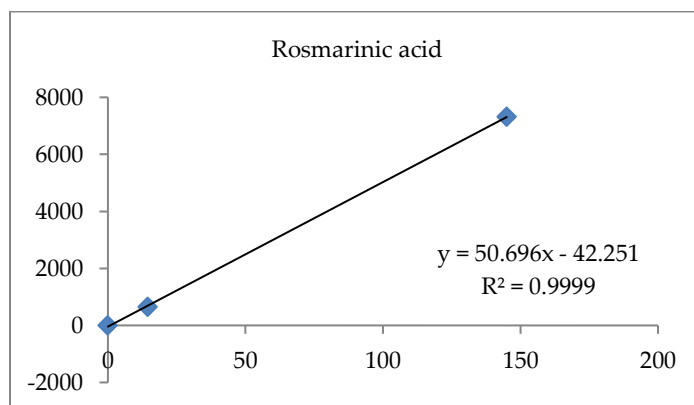

(g)

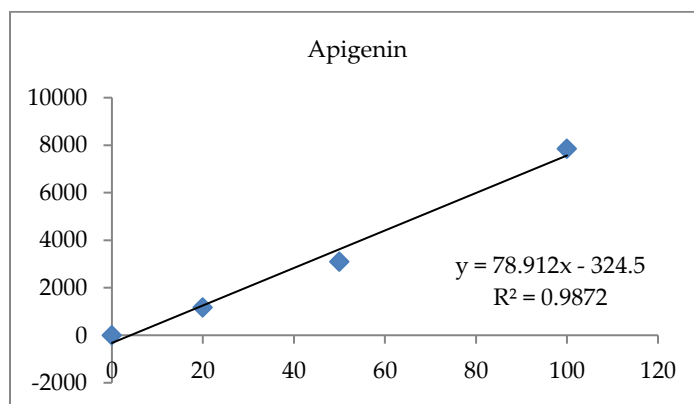

(h)

**Fig 1S.** Calibration curves of polyphenolic standards a) Gallic acid, b) Chlorogenic acid, c) Caffeic acid, d) *p*-coumaric acid, e) Rutin, f) Ferulic acid, g) Rosmarinic acid, h) Apigenin.
